# Supplementary material for: A procedure and double-chambered device for macromolecular crystal flash-cooling in different cryogenic liquids
Source: PubMed Central journal article supplement (PMC7518608; doi:10.1371/journal.pone.0239706), 2020-09-25
Supplement: pone.0239706.s002.pdf [file pone.0239706.s002.pdf]

**S1 Table.** Processing statistics of each individual crystal and data acquisition parameters.

| Cryogen | Protein                    | Average Mosaicity [°] <sup>a</sup> | I/ $\sigma$ I <sup>a</sup> | CC1/2 [%] <sup>a</sup> |
|---------|----------------------------|------------------------------------|----------------------------|------------------------|
|         |                            | mean                               | mean                       | mean                   |
| LN2     | SfMCT <sup>b</sup>         | 0.17                               | 0.40                       | 26.2                   |
|         |                            | 0.15                               | 0.80                       | 51.7                   |
|         |                            | 0.12                               | 1.10                       | 66.9                   |
|         |                            | 0.11                               | 1.20                       | 65.1                   |
|         |                            | 0.11                               | 1.50                       | 75.4                   |
|         |                            | <b>0.13</b>                        | <b>1.00</b>                | 57.1                   |
| Propane | SfMCT <sup>b</sup>         | 0.09                               | 0.80                       | 54.0                   |
|         |                            | 0.10                               | 0.90                       | 56.5                   |
|         |                            | 0.12                               | 1.00                       | 59.3                   |
|         |                            | 0.11                               | 1.10                       | 58.4                   |
|         |                            | 0.10                               | 1.20                       | 64.2                   |
|         |                            | <b>0.10</b>                        | <b>1.00</b>                | 58.5                   |
| Ethane  | SfMCT <sup>b</sup>         | 0.09                               | 0.80                       | 53.7                   |
|         |                            | 0.10                               | 0.90                       | 49.2                   |
|         |                            | 0.10                               | 1.00                       | 60.6                   |
|         |                            | 0.08                               | 1.10                       | 64.9                   |
|         |                            | 0.09                               | 1.30                       | 63.1                   |
|         |                            | <b>0.09</b>                        | <b>1.02</b>                | 58.3                   |
| LN2     | HEWL <sup>c</sup><br>small | 0.31                               | 3.70                       | 90.1                   |
|         |                            | 0.34                               | 1.50                       | 58.6                   |
|         |                            | 0.35                               | 1.50                       | 76.3                   |
|         |                            | 0.54                               | 1.30                       | 84.5                   |
|         |                            | 0.29                               | 5.30                       | 97.1                   |
|         |                            | <b>0.37</b>                        | <b>2.66</b>                | 81.3                   |
| Ethane  | HEWL <sup>c</sup><br>small | 0.27                               | 3.80                       | 90.9                   |
|         |                            | 0.46                               | 2.60                       | 83.0                   |
|         |                            | 0.30                               | 2.20                       | 80.8                   |
|         |                            | 0.28                               | 1.60                       | 66.7                   |
|         |                            | 0.35                               | 4.60                       | 93.0                   |
|         |                            | <b>0.33</b>                        | <b>2.96</b>                | 82.9                   |
| LN2     | HEWL <sup>c</sup><br>Large | 0.34                               | 3.70                       | 90.3                   |
|         |                            | 0.15                               | 8.20                       | 98.1                   |
|         |                            | 0.61                               | 2.70                       | 91.1                   |
|         |                            | 0.49                               | 3.10                       | 87.1                   |
|         |                            | 0.13                               | 8.60                       | 98.2                   |
|         |                            | <b>0.34</b>                        | <b>5.26</b>                | 93.0                   |
| Ethane  | HEWL <sup>c</sup><br>large | 0.32                               | 4.40                       | 93.3                   |
|         |                            | 0.31                               | 5.10                       | 94.9                   |
|         |                            | 0.25                               | 4.60                       | 92.5                   |
|         |                            | 0.37                               | 4.90                       | 94.5                   |
|         |                            | 0.30                               | 4.60                       | 93.6                   |
|         |                            | <b>0.31</b>                        | <b>4.72</b>                | 93.8                   |

<sup>a</sup> Data reflects values of the highest resolution shell, i.e., for HEWL (1.48-1.40 Å) and SfMCT (2.96-2.81 Å).

<sup>b</sup> Data acquisition parameters: PXI beamline at the Swiss Light Source (SLS) of the Paul Scherrer Institute (PSI); Detector, Dectris Eiger 16M;  $\lambda=1$  Å; Oscillation angle, 0.2°; Total images recorded 1800.

<sup>c</sup> Data acquisition parameters: PXIII beamline at SLS, PSI; Detector, Dectris Pilatus 2M;  $\lambda=1$  Å; Oscillation angle, 1.0°; Total images recorded 360.
